# Supplementary material
Source: HighWire-hosted journal article supplement (https://bmjopen.bmj.com/content/11/11/e051008)

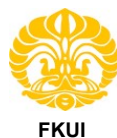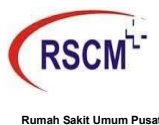

## Komite Etik Penelitian Kesehatan FKUI-RSCM

### LEMBAR PENJELASAN KEPADA CALON SUBJEK

Kami tim peneliti dari **Departemen Anestesiologi dan Terapi Intensif** Fakultas Kedokteran Universitas Indonesia/ RSUPN Dr. Cipto Mangunkusumo (**FK UI/ RSCM**) yang diketuai oleh **Dr. dr. Aida Rosita Tantri, Sp.An, KAR**, akan melakukan penelitian dengan judul **Efektivitas blok tepi tulang dada dalam mengurangi nyeri dan respons radang pascabedah jantung terbuka: kajian terhadap pemakaian dan waktu pertama pemberian obat nyeri pascabedah, waktu pelepasan pipa napas, dan kadar penanda respons peradangan.**

Saya akan memberikan informasi kepada Bapak/Ibu/Saudara mengenai penelitian ini dan mengundang Bapak/Ibu/Saudara untuk berpartisipasi dalam penelitian ini dengan cara menandatangani formulir ini. Jika setuju untuk berpartisipasi dalam penelitian ini, Bapak/Ibu/Saudara dapat kapan saja secara bebas mundur dari penelitian ini. Bapak/Ibu/Saudara juga berhak untuk menerima informasi terbaru mengenai prosedur yang sedang diujikan. Jika Bapak/Ibu/Saudara menolak untuk berpartisipasi atau mundur dari penelitian ini, keputusan tersebut tidak akan mempengaruhi hubungan Bapak/Ibu/Saudara dengan saya dan tidak akan berdampak pada pelayanan di rumah sakit ini. Jika ada pernyataan yang tidak dimengerti, Bapak/Ibu/ Saudara dapat menanyakannya kepada saya.

#### **Pendahuluan**

Bedah jantung terbuka adalah tindakan bedah mayor yang mengakibatkan nyeri pascabedah dengan berbagai dampak buruk jangka pendek dan jangka panjang bagi pasien. Nyeri pascabedah jantung dapat menyebabkan berbagai komplikasi, memperpanjang masa rawat, meningkatkan biaya perawatan, dan dapat berkembang menjadi nyeri kronis. Untuk mencegah dampak buruk tersebut, telah dikembangkan metode antinyeri multidimensional yang mengkombinasikan penggunaan obat antinyeri dan teknik anestesia regional. Blok tepi tulang dada adalah salah satu blok saraf tepi dalam teknik anestesia regional. Ini merupakan tindakan untuk membantu mengurangi rasa nyeri pascabedah.

#### **Tujuan**

Untuk mengetahui pengaruh teknik blok tepi tulang dada pada bedah jantung terbuka, yang dilihat dari aspek pemakaian dan waktu pertama pemberian obat nyeri pascabedah, waktu pelepasan pipa napas, dan kadar penanda respons peradangan.

#### **Partisipasi dalam Penelitian**

Partisipasi Bapak/Ibu/Saudara dalam penelitian ini berupa menjalani prosedur blok tepi tulang dada dan pengambilan sampel darah sekitar satu sendok teh untuk pemeriksaan kadar penanda respons peradangan melalui selang infus besar yang telah terpasang. Pengambilan sampel akan selesai 48 jam pascabedah, namun Bapak/Ibu/ Saudara tetap akan kami ikuti selama perawatan di rumah sakit.

#### **Alasan Memilih Bapak/Ibu/Saudara**

Bapak/Ibu/Saudara kami pilih untuk berpartisipasi dalam penelitian ini karena memenuhi kriteria sebagai berikut: berusia 19-75 tahun, akan menjalani bedah jantung terbuka yang terencana, akan menjalani bedah jantung terbuka dengan membuka tulang dada dan menggunakan mesin pompa jantung-paru.

#### **Prosedur Penelitian**

##### **Informasi prosedur intervensi**

1. Bapak/Ibu/Saudara akan menjalani proses persiapan operasi di ruang perawatan sesuai standar yang berlaku. Pada proses persiapan akan dilakukan wawancara terkait identitas, status kesehatan, dan riwayat penyakit; dan dijelaskan cara penggunaan alat pemberi obat antinyeri pascabedah.
2. Bapak/Ibu/Saudara akan menjalani proses pengundian untuk menentukan apakah masuk ke dalam kelompok perlakuan atau kontrol, sehingga setiap pasien mempunyai peluang yang sama. Kelompok perlakuan akan mendapatkan blok tepi tulang dada, sedangkan kelompok kontrol tidak. Peneliti maupun



## Komite Etik Penelitian Kesehatan FKUI-RSCM

- pasien tidak mengetahui pembagian kelompok tersebut. Selama tindakan blok dilakukan, tenaga kesehatan yang terlibat dalam manajemen anestesia (pembiusan) dan pengambilan data tidak berada di ruang tindakan. Hal ini ditujukan untuk menjaga keakuratan hasil penelitian.
3. Bapak/Ibu/Saudara akan diambil sampel darah sebanyak tiga kali yaitu: satu kali sebelum dan dua kali setelah pembedahan. Sebanyak satu sendok teh darah akan diambil setiap kali mengambil sampel.
  4. Bapak/Ibu/Saudara akan menjalani prosedur anestesia (pembiusan) dan pembedahan dilakukan sesuai standar yang berlaku. Blok tepi tulang dada akan kami lakukan di ruang operasi sebelum pembedahan dimulai. Blok tepi tulang dada dilakukan pada dinding dada bagian depan, di samping kiri dan kanan tulang dada, di antara lapisan otot. Blok tepi tulang dada akan dilakukan dengan panduan ultrasonografi (USG) untuk memastikan posisi ujung jarum, menghindari cedera pembuluh darah, dan penempatan obat anestesia lokal.
  5. Pascabedah Bapak/Ibu/Saudara akan dirawat di ruang terapi intensif jantung. Pipa napas akan tetap terpasang hingga Bapak/Ibu/Saudara sadar baik dan mampu menjaga fungsi pernapasan. Untuk mengatasi nyeri pascabedah, akan dipasang alat pemberi obat antinyeri yang pemberiannya ditentukan oleh Bapak/Ibu/Saudara dengan memencet tombol. Selama belum sadar dan tidak mampu melaporkan nyeri, tombol tersebut akan dipencet oleh dokter jaga jika Bapak/Ibu/Saudara dinilai mengalami nyeri berdasarkan skor yang telah ditetapkan.

### Prosedur alternatif yang tersedia saat ini

Selama ini tatalaksana nyeri pascabedah jantung terbuka dilakukan dengan pemberian obat antinyeri golongan opioid tanpa teknik blok saraf tepi. Untuk itu dibutuhkan dosis obat antinyeri opioid yang tinggi untuk mengontrol nyeri. Dosis obat antinyeri golongan opioid yang tinggi berkaitan dengan risiko depresi napas, mual, muntah, dan sembelit, sehingga dapat menunda pelepasan pipa napas, memperpanjang masa perawatan, infeksi paru, dan komplikasi lainnya.

### Ketidaknyamanan bagi Bapak/Ibu/Saudara

Penelitian ini secara umum tidak mempengaruhi kenyamanan Bapak/Ibu/Saudara karena blok tepi tulang dada dilakukan setelah pasien dianestesia (dibus umum) dan pengambilan sampel darah dilakukan tanpa suntikan ke tubuh pasien, melainkan melalui selang infus besar yang telah terpasang.

### Risiko, Efek Samping, dan Penanganan

Blok tepi tulang dada telah dilaporkan penggunaannya sejak tahun 2015 di beberapa negara. Laporan kasus dan data penelitian sebelumnya telah menunjukkan keamanan blok tepi tulang dada dengan panduan USG. Penggunaan USG sebagai panduan dalam melakukan blok tepi tulang dada akan meningkatkan keamanan dan keberhasilan blok. Obat anestesi lokal yang digunakan juga merupakan obat yang rutin digunakan pada teknik anestesia regional. Namun demikian, setiap tindakan medis invasif tidak dapat dilepaskan dari risiko. Potensi risiko yang dapat terjadi akibat blok ini berupa infeksi, lebam, dan cedera selaput paru. Komplikasi lebam akan kami cegah dengan penggunaan USG, dimana jarum blok dihindari melewati pembuluh darah. Komplikasi cedera selaput paru juga kami hindari dengan penggunaan USG, sehingga ujung jarum dapat dipantau secara kontinu selama tindakan. Pada pembedahan ini dinding dada terbuka, sehingga jika terjadi cedera selaput paru tidak menimbulkan komplikasi serius. Potensi efek samping yang dapat terjadi akibat obat anestesi lokal dapat berupa reaksi alergi dan keracunan sistemik. Segala komplikasi dan efek samping yang terjadi akan ditangani sesuai standar yang berlaku.

### Manfaat

Bapak/Ibu/Saudara akan mendapatkan pengawasan yang intensif dalam pengelolaan nyeri dan mendapatkan akses pelayanan nyeri yang memadai. Keikutsertaan Bapak/Ibu/Saudara juga bermanfaat bagi orang lain di masa yang akan datang dengan adanya manajemen nyeri yang efektif, sehingga pasien aman dan nyaman, komplikasi akibat pembedahan menurun, masa perawatan lebih pendek, dan biaya perawatan lebih rendah.

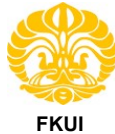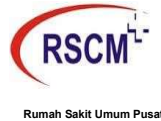

## Komite Etik Penelitian Kesehatan FKUI-RSCM

### **Kompensasi**

Tidak ada imbalan berupa uang, souvenir, dan bentuk lainnya atas partisipasi Bapak/Ibu/Saudara dalam penelitian ini.

### **Pembiayaan**

Pembiayaan penelitian ini ditanggung sepenuhnya oleh tim peneliti. Bapak/Ibu/ Saudara tidak akan dipungut biaya sehubungan dengan penelitian ini.

### **Kerahasiaan**

Semua data yang dikumpulkan dalam penelitian ini akan dijaga kerahasiaannya. Lembar data penelitian tidak mencantumkan nama Bapak/Ibu/Saudara, namun hanya inisial nama saja. Lembar data penelitian tersebut akan dikumpulkan dalam satu map dan disimpan di lemari khusus data penelitian di Departemen Anestesiologi dan Terapi Intensif FK UI/ RSCM. Penggunaan kembali data tersebut harus mendapatkan ijin tim peneliti. Presentasi hasil penelitian dalam pertemuan ilmiah/konferensi dan publikasi dalam jurnal ilmiah tidak akan mencantumkan nama Bapak/Ibu/Saudara. Namun demikian, komite etik penelitian kesehatan FK UI/ RSCM dan institusi terkait akan memiliki akses terhadap data penelitian untuk kepentingan verifikasi data penelitian.

### **Kewajiban Bapak/Ibu/Saudara**

Bapak/Ibu/Saudara berkewajiban mengikuti aturan atau petunjuk penelitian seperti yang tertulis di atas. Bila ada yang belum jelas, Bapak/Ibu/Saudara bisa bertanya lebih lanjut kepada tim peneliti. Selama penelitian, tidak diperbolehkan minum obat lain ataupun jamu selain yang diberikan oleh peneliti.

### **Hak untuk Menolak dan Mengundurkan Diri**

Bapak/Ibu/Saudara tidak harus berpartisipasi dalam penelitian ini bila tidak menghendakinya. Bapak/Ibu/Saudara harus paham bahwa walaupun Bapak/Ibu/ Saudara menyetujui untuk berpartisipasi, Bapak/Ibu/Saudara berhak untuk mundur dari penelitian ini. Jika Bapak/Ibu/Saudara menolak untuk berpartisipasi atau mundur dari penelitian ini, keputusan tersebut tidak akan mempengaruhi hubungan Bapak/Ibu/Saudara dengan saya dan tidak akan berdampak pada standar pelayanan yang berlaku di rumah sakit ini. Saya akan memberikan kesempatan pada Bapak/Ibu/Saudara pada akhir penjelasan ini untuk dapat mempertimbangkan keputusan yang akan diambil.

### **Akses Pascapenelitian**

Pada akhir penelitian ini, kami akan tetap memberikan manajemen nyeri yang terbaik. Bapak/Ibu/ Saudara tetap akan kami ikuti selama perawatan di rumah sakit.

### **Informasi Tambahan**

Bapak/Ibu/Saudara diberi kesempatan untuk menanyakan semua hal yang belum jelas sehubungan dengan penelitian ini. Bila sewaktu-waktu terjadi efek samping atau membutuhkan penjelasan lebih lanjut, Bapak/Ibu/Saudara dapat menghubungi Dr. dr. Aida Rosita Tantri, Sp.An, KAR pada no. HP 08 161 832487 atau dr. A. A. Gde Putra Semara Jaya, Sp.An, M.Biomed pada no. HP 081 916 241 248 atau 081 339 69 42 39 di Departemen Anestesiologi dan Terapi Intensif FK UI/ RSCM di Gedung A Lantai 6.

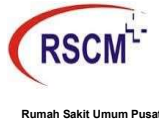

## Komite Etik Penelitian Kesehatan FKUI-RSCM

### LEMBAR PERSETUJUAN KEIKUTSERTAAN DALAM PENELITIAN

Semua penjelasan tersebut telah disampaikan kepada saya dan semua pertanyaan saya telah dijawab oleh **Dr. dr. Aida Rosita Tantri, Sp.An, KAR**. Saya mengerti bahwa bila memerlukan penjelasan, saya dapat menanyakan kepada **Dr. dr. Aida Rosita Tantri, Sp.An, KAR**.

| Sertifikat Persetujuan ( <i>Consent</i> )                                                                                                                                                                                                      |                                                                                                                                                                                                                              |
|------------------------------------------------------------------------------------------------------------------------------------------------------------------------------------------------------------------------------------------------|------------------------------------------------------------------------------------------------------------------------------------------------------------------------------------------------------------------------------|
| Saya telah membaca semua penjelasan tentang penelitian ini. Saya telah diberikan kesempatan untuk bertanya dan semua pertanyaan saya telah dijawab dengan jelas. Saya bersedia untuk berpartisipasi pada studi penelitian ini dengan sukarela. | Saya mengkonfirmasi bahwa peserta telah diberikan kesempatan untuk bertanya mengenai penelitian ini, dan semua pertanyaan telah dijawab dengan benar. Saya mengkonfirmasi bahwa persetujuan telah diberikan dengan sukarela. |
| _____                                                                                                                                                                                                                                          | _____                                                                                                                                                                                                                        |
| Nama subjek/wali                                                                                                                                                                                                                               | Nama peneliti/peminta persetujuan                                                                                                                                                                                            |
| _____                                                                                                                                                                                                                                          | _____                                                                                                                                                                                                                        |
| Tanda tangan peserta studi                                                                                                                                                                                                                     | Tanda tangan peneliti/peminta persetujuan                                                                                                                                                                                    |
| Tanggal _____                                                                                                                                                                                                                                  | Tanggal _____                                                                                                                                                                                                                |
| hari/bulan/tahun                                                                                                                                                                                                                               | hari/bulan/tahun                                                                                                                                                                                                             |

#### Informasi Peneliti:

Peneliti Utama : **Dr. dr. Aida Rosita Tantri, Sp.An, KAR**  
 : Departemen Anestesiologi dan Terapi Intensif FK UI/ RSCM  
 : 08 161 832487, [aidatantri@yahoo.com](mailto:aidatantri@yahoo.com)

Peneliti : **dr. A.A. Gde Putra Semara Jaya, Sp.An, M.Biomed**  
 : Departemen Anestesiologi dan Terapi Intensif FK UI/ RSCM  
 : 081 916 241 248/ 081 339 69 42 39, [gungthey84@yahoo.com](mailto:gungthey84@yahoo.com)

: **dr. Aldy Heriwardito, Sp.An, KAKV**  
 : Departemen Anestesiologi dan Terapi Intensif FK UI/ RSCM  
 : 081 3862 11017, [aldy.heriwardito@gmail.com](mailto:aldy.heriwardito@gmail.com)

: **dr. Arif Mansjoer, Sp.PD, KKV, KIC, M.Epid**  
 : Departemen Ilmu Penyakit Dalam FK UI/ RSCM  
 : 081 291 37 297, [arif.mansjoer@gmail.com](mailto:arif.mansjoer@gmail.com)

#### KEPK FKUI-RSCM

Alamat : Jalan Salemba 6, Jakarta Pusat, 10430  
 No. Telp. : 021 3157008  
 Email : [ec\\_fkui@yahoo.com](mailto:ec_fkui@yahoo.com)

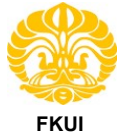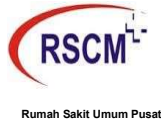

## Komite Etik Penelitian Kesehatan FKUI-RSCM

### Apabila subjek tuna aksara

Seorang saksi yang tidak tuna aksara harus menandatangani (apabila memungkinkan, orang ini harus dipilih oleh subjek/partisipan penelitian, bukan orangtuanya, dan tidak boleh memiliki hubungan dengan tim peneliti). Subjek/partisipan penelitian yang tuna aksara juga harus menyertakan cap sidik jarinya.

**Saya telah menyaksikan pembacaan dari lembar persetujuan (*consent*) kepada subjek/partisipan penelitian dengan akurat, dan telah diberikan kesempatan untuk mengajukan pertanyaan. Saya mengkonfirmasi bahwa subjek/partisipan telah memberikan persetujuannya dengan bebas.**

Nama saksi \_\_\_\_\_ dan sidik jari subjek penelitian

Tanda tangan saksi \_\_\_\_\_

Tanggal \_\_\_\_\_  
tanggal/bulan/tahun

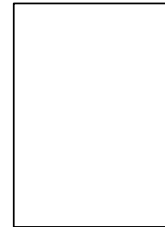

Supplement: inline-supplementary-material-1 [file inline-supplementary-material-1.pdf]
